# Supplementary material
Source: PubMed Central journal article supplement (PMC7832277)
Supplement: mmc1.pdf [file mmc1.pdf]

# THE LANCET

## Infectious Diseases

### Supplementary appendix

This appendix formed part of the original submission and has been peer reviewed.  
We post it as supplied by the authors.

Supplement to: Dodd RH, Pickles K, Nickel B, et al. Concerns and motivations about COVID-19 vaccination. *Lancet Infect Dis* 2020; published online Dec 15.  
[https://doi.org/10.1016/S1473-3099\(20\)30926-9](https://doi.org/10.1016/S1473-3099(20)30926-9).

**Appendix 1:** Frequencies of response to all reasons for being willing or not to receive a future COVID-19 vaccine

| Reason                                                                     | Total          | June<br>N (%)  | July<br>N (%)  | Example quote                                                                                                                                   |
|----------------------------------------------------------------------------|----------------|----------------|----------------|-------------------------------------------------------------------------------------------------------------------------------------------------|
|                                                                            | <b>N=2859*</b> | <b>N=1399*</b> | <b>N=1460*</b> |                                                                                                                                                 |
| <b>AGREE</b>                                                               |                |                |                |                                                                                                                                                 |
| Protect self and others/those who can't get the vaccine from getting sick  | 817<br>(28.6)  | 424<br>(30.5)  | 393<br>(26.9)  | Being vaccinated means I cannot be a carrier and infect people with a weaker immune system who would get seriously ill if they catch the virus. |
| Believe in vaccines and immunisation/trust science                         | 448<br>(15.7)  | 176<br>(11.0)  | 272<br>(16.6)  | Vaccinations are a vital part of public health and if one was available I would take it.                                                        |
| Help stop the virus spread/herd immunity/get rid of virus/end pandemic     | 419<br>(14.7)  | 195<br>(14.0)  | 224<br>(15.4)  | A vaccine is the only way to eradicate the virus and therefore reduce the threat, just like measles vaccine for example.                        |
| Depends on amount of testing and efficacy/proven safety/side effects       | 311<br>(10.9)  | 148<br>(10.7)  | 163<br>(11.2)  | It has to be safe and effective and long lasting.                                                                                               |
| Get life back to normal                                                    | 165 (5.8)      | 71 (5.1)       | 94 (6.5)       | Because I'd like to return to normal life.                                                                                                      |
| Smart/logical choice/why not/makes sense                                   | 164 (5.7)      | 97 (6.9)       | 67 (4.6)       | Basic common sense and scientific fact of reasoning.                                                                                            |
| To be able to travel                                                       | 96 (3.4)       | 56 (4.0)       | 40 (2.7)       | If it is likely that it will allow me travel internationally to see family, I will be happy to take the vaccine.                                |
| Job or university requirement                                              | 89 (3.1)       | 38 (2.7)       | 51 (3.5)       | I work in health care. There really is no choice, you must be vaccinated.                                                                       |
| Responsible thing to do/social responsibility/moral duty/right thing to do | 47 (1.7)       | 29 (2.1)       | 18 (1.2)       | It is the socially responsible action.                                                                                                          |
| To feel safe/less anxious/peace of mind                                    | 38 (1.3)       | 20 (1.5)       | 18 (1.2)       | So I can resume a normal lifestyle without fear of infection.                                                                                   |
| Doctors/government recommendation                                          | 37 (1.3)       | 21 (1.5)       | 16 (1.1)       | if my doctor recommends the vaccine in my current health condition, then I will have it.                                                        |
| More vulnerable/high-risk first                                            | 35 (1.2)       | 14 (1.0)       | 21 (1.4)       | I would wait until the more vulnerable people had received it because I am not confident about sufficient supply.                               |
| Need more information first                                                | 27 (1.0)       | 13 (0.9)       | 14 (1.0)       | Need more information on the vaccine first but I do generally get vaccinated where possible.                                                    |
| Cost                                                                       | 23 (0.8)       | 8 (0.6)        | 15 (1.0)       | If the price is affordable, I will get the vaccine ASAP.                                                                                        |
| If available to me/access                                                  | 21 (0.7)       | 14 (1.0)       | 7 (0.5)        | Not sure Australia will get access to it and this concerns me as countries are looking after them selves.                                       |
| Other/cannot code                                                          | 122 (4.3)      | 75 (5.4)       | 47 (3.2)       | e.g. Get Crook, our at least try to slug it out.                                                                                                |

| <b>DISAGREE/INDIFFERENT</b>                                      | <b>N=388*</b> | <b>N=209*</b> | <b>N=179*</b> |                                                                                                             |
|------------------------------------------------------------------|---------------|---------------|---------------|-------------------------------------------------------------------------------------------------------------|
| Safety – rushed, need to know efficacy                           | 139 (35.8)    | 72 (34.5)     | 67 (37.4)     | Would wait for longer testing period before taking.                                                         |
| Safety – side effects                                            | 38 (9.8)      | 21 (10.0)     | 17 (9.5)      | Uncertainty about side effects particularly those longer term side effects.                                 |
| Need more information                                            | 32 (8.2)      | 19 (9.1)      | 13 (7.3)      | Not enough information at this present time to make an informed decision.                                   |
| Lack of trust – government, lack of testing, pharma, new vaccine | 17 (4.4)      | 10 (4.8)      | 7 (3.9)       | Lack of trust in the government and big pharma.                                                             |
| Other comorbidities                                              | 15 (3.9)      | 4 (2.0)       | 11 (6.2)      | Not enough known because of my illness.                                                                     |
| Previous vaccine history/Don't like needles                      | 15 (3.9)      | 4 (2.0)       | 11 (6.2)      | Fear and phobia of needles and medical procedures.                                                          |
| For more vulnerable/high-risk first                              | 13 (3.4)      | 7 (3.3)       | 6 (3.4)       | I think the vulnerable should get first access and it needs to go through vigorous testing before released. |
| COVID is mutating                                                | 10 (2.6)      | 7 (3.3)       | 3 (1.7)       | It will continue to mutate like with the flu.                                                               |
| Dependent on perceived risk/threat of COVID                      | 11 (2.8)      | 11 (5.3)      | -             | Depends on how great the risk of covid is at the time.                                                      |
| Need doctor recommendation                                       | 6 (1.5)       | 2 (1.0)       | 4 (2.2)       | I will wait for advice from my doctor. If going overseas I probably would get the injection                 |
| Possible financial/time cost                                     | 6 (1.5)       | 3 (1.4)       | 3 (1.7)       | It could be expensive.                                                                                      |
| Other measures to protect themselves from COVID                  | 6 (1.5)       | 5 (2.4)       | 1 (0.6)       | I think that if I do catch it I'll just isolate for 14 days.                                                |
| If required - travel internationally, work                       | 3 (0.8)       | 3 (1.4)       | -             | Only if required by work.                                                                                   |
| Other/cannot code                                                | 52 (13.4)     | 29 (13.9)     | 23 (12.8)     | e.g. Not sure if I will get the COVID-19 vaccine; response did not match selection                          |

\*some free-text responses were allocated more than one code

**Appendix 2:** Demographic characteristics at June (n=1370\*), and logistic regression of agreement with getting a COVID-19 vaccine if it becomes available, as a function of demographic characteristics, at June and July. Outcomes for regression modelling were coded as disagree/indifferent vs. agree and are presented as adjusted odds ratios (95% confidence intervals). P-values are provided in the study factor row.

| Study Factor            | June (n=1370)*        |                                            |                   | July (n=1273)*                          |                   |
|-------------------------|-----------------------|--------------------------------------------|-------------------|-----------------------------------------|-------------------|
|                         | Descriptives<br>n (%) | Agree to<br>COVID-<br>19<br>vaccine<br>(%) | OR<br>(95% CI)^   | Agree to<br>COVID-<br>19 vaccine<br>(%) | OR<br>(95% CI)^   |
| <b>Health literacy^</b> |                       |                                            | p=0.77            |                                         | p=0.74            |
| Adequate                | 1270 (92.7)           | 87.2%                                      | 1.00 (ref)        | 89.8%                                   | 1.00 (ref)        |
| Inadequate              | 100 (7.3)             | 87.0%                                      | 1.10 (0.58, 2.07) | 89.1%                                   | 1.13 (0.55, 2.34) |
| <b>Age</b>              |                       |                                            | p<0.001           |                                         | p=0.001           |
| 18-25 years             | 233 (17.0)            | 88.8%                                      | 1.78 (1.01, 3.15) | 89.8%                                   | 1.62 (0.84, 3.14) |
| 26-40 years             | 372 (27.2)            | 86.3%                                      | 1.00 (ref)        | 89.9%                                   | 1.00 (ref)        |
| 41-55 years             | 344 (25.1)            | 80.8%                                      | 0.67 (0.45, 1.01) | 85.7%                                   | 0.68 (0.43, 1.09) |
| 56-90 years             | 421 (30.7)            | 92.2%                                      | 2.06 (1.29, 3.30) | 93.2%                                   | 1.76 (1.02, 3.02) |
| <b>Education</b>        |                       |                                            | p<0.001           |                                         | p<0.001           |
| University              | 1032 (75.3)           | 89.0%                                      | 1.00 (ref)        | 91.1%                                   | 1.00 (ref)        |
| Certificate I-IV        | 140 (10.2)            | 79.3%                                      | 0.43 (0.27, 0.68) | 90.0%                                   | 0.83 (0.44, 1.54) |
| High school or<br>less  | 198 (14.4)            | 83.3%                                      | 0.44 (0.27, 0.72) | 83.0%                                   | 0.35 (0.21, 0.58) |

^ Health literacy adequacy was based on a single-item health literacy screener

\* Sample includes 997 participants who provided responses to both June and July surveys
